# Supplementary material for: Metabolic changes associated with metformin potentiates Bcl-2 inhibitor, Venetoclax, and CDK9 inhibitor, BAY1143572 and reduces viability of lymphoma cells
Source: PubMed Central journal article supplement (PMC5940409; doi:10.18632/oncotarget.24989), 2018-04-20
Supplement: oncotarget-09-21166-s001.pdf [file oncotarget-09-21166-s001.pdf]

## Metabolic changes associated with metformin potentiates Bcl-2 inhibitor, Venetoclax, and CDK9 inhibitor, BAY1143572 and reduces viability of lymphoma cells

### SUPPLEMENTARY MATERIALS

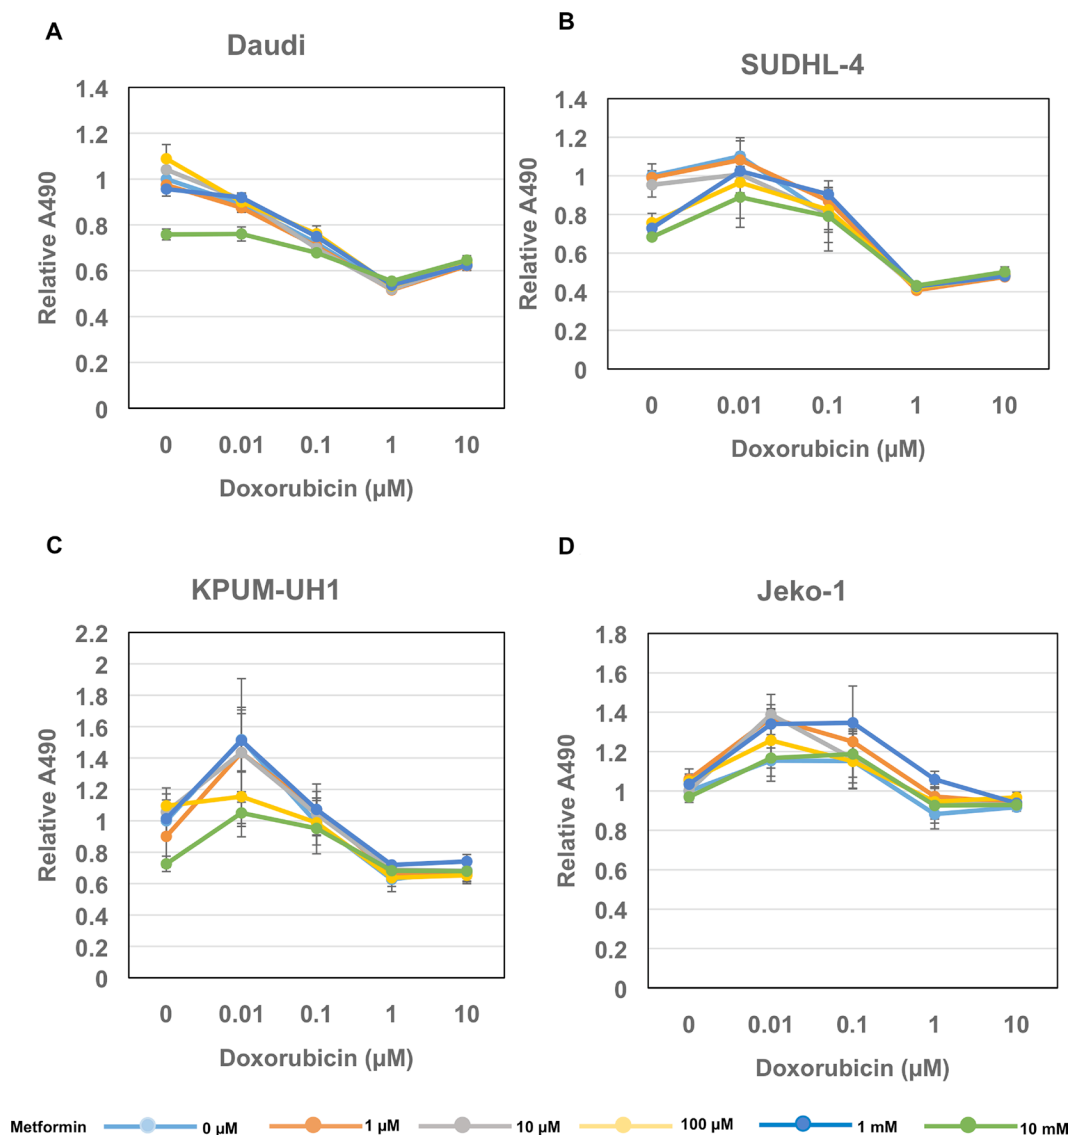

**Supplementary Figure 1: Metformin does not potentiate Doxorubicin.** 10,000 cells (A Daudi, B SUDHL-4, C KPUM-UH1, D Jeko-1) were plated per well of a 96-well plate and treated with dose response series of both metformin (0–10 mM) and Doxorubicin (0–10 μM). Viability after 3 days was analyzed using MTS assay. Briefly 20 μL of MTS reagent was added to cells and incubated for 2 hours and absorbance at 490 nm was read using biotek plate reader. Relative absorbance is calculated after setting the average absorbance of No tx ctrl as 1.

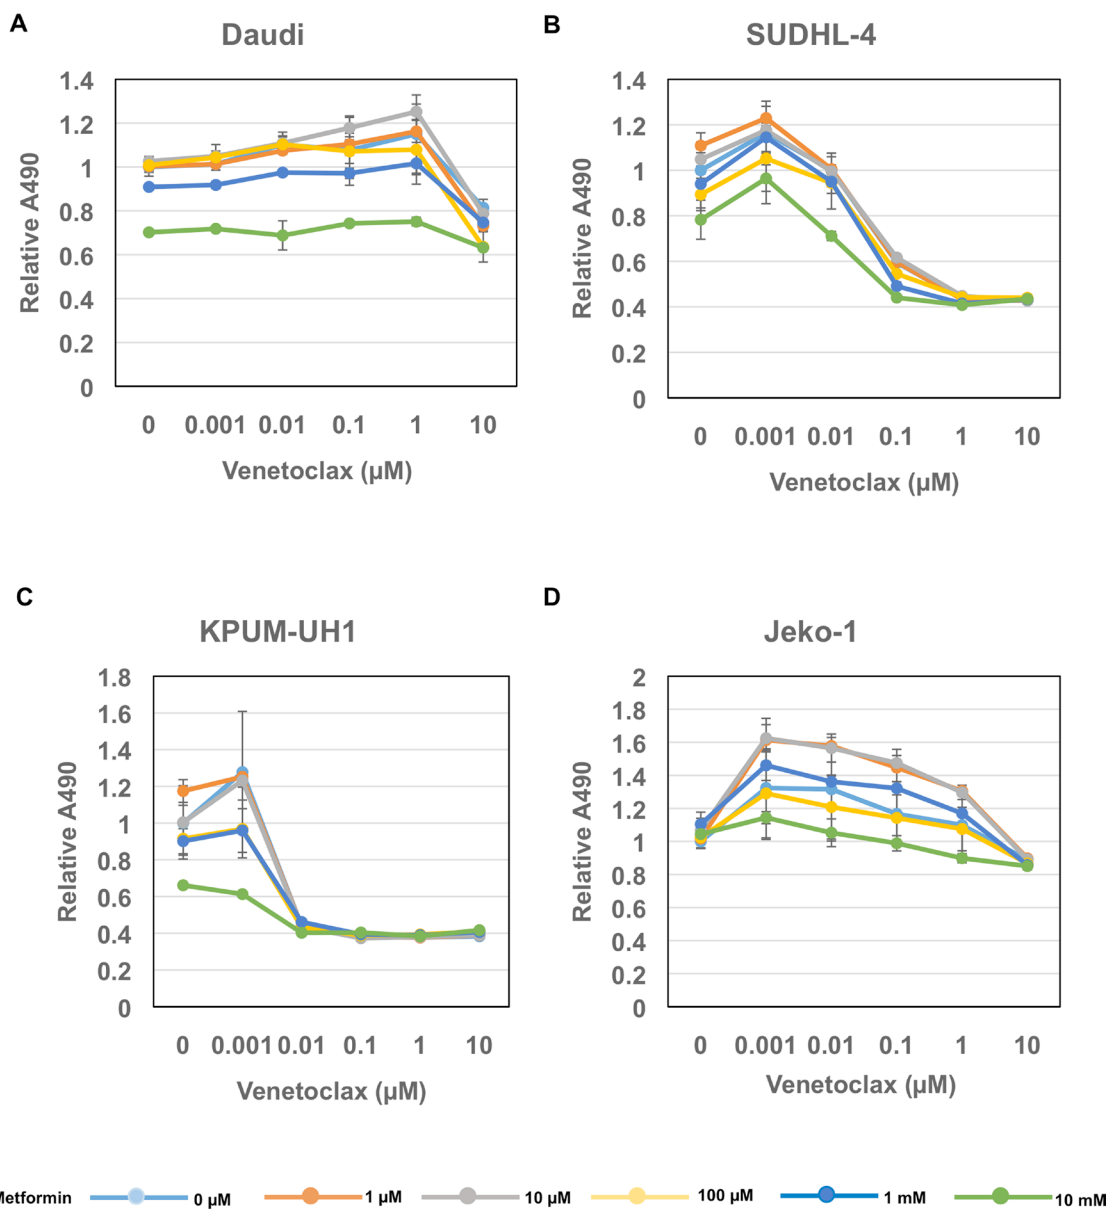

**Supplementary Figure 2: Metformin potentiates Venetoclax in cell-type dependent manner.** 10,000 cells (A Daudi, B SUDHL-4, C KPUM-UH1, D Jeko-1) were plated per well of a 96-well plate and treated with dose response series of both metformin (0–10 mM) and Venetoclax (0–10 nM) Viability after 3 days was analyzed using MTS assay. Briefly 20 μL of MTS reagent was added to cells and incubated for 2 hours and absorbance at 490 nm was read using biotek plate reader. Relative absorbance is calculated after setting the average absorbance of No tx ctrl as 1.

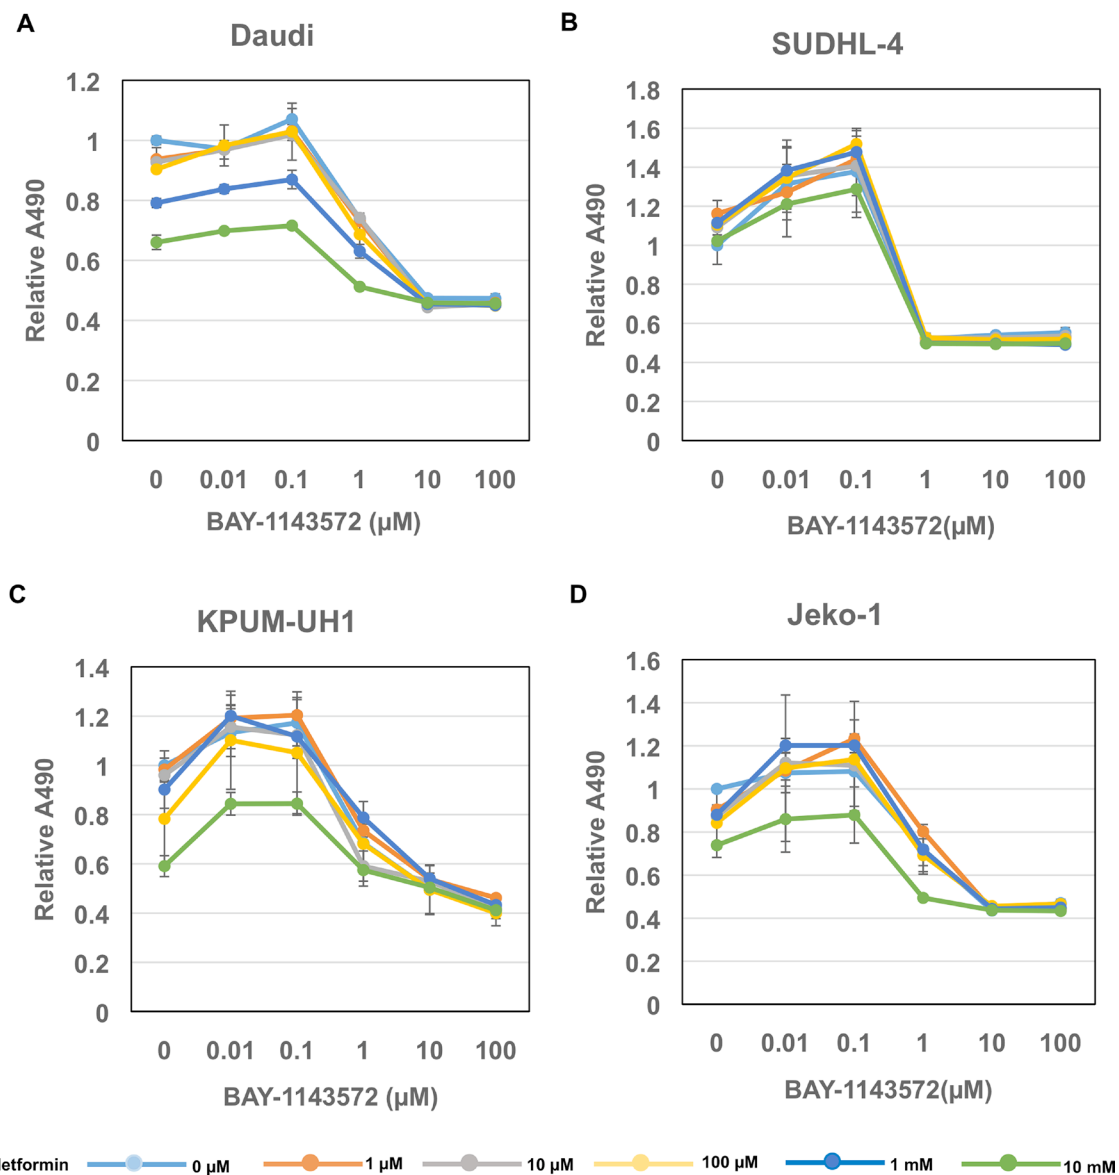

**Supplementary Figure 3: Metformin potentiates BAY-1143572 in cell-type dependent manner.** 10,000 cells (A Daudi, B SUDHL-4, C KPUM-UH1, D Jeko-1) were plated per well of a 96-well plate and treated with dose response series of both metformin (0–10 mM) and BAY-1143572 (0–100 μM). Viability after 3 days was analyzed using MTS assay. Briefly 20 μL of MTS reagent was added to cells and incubated for 2 hours and absorbance at 490 nm was read using biotek plate reader. Relative absorbance is calculated after setting the average absorbance of No tx ctrl as 1.

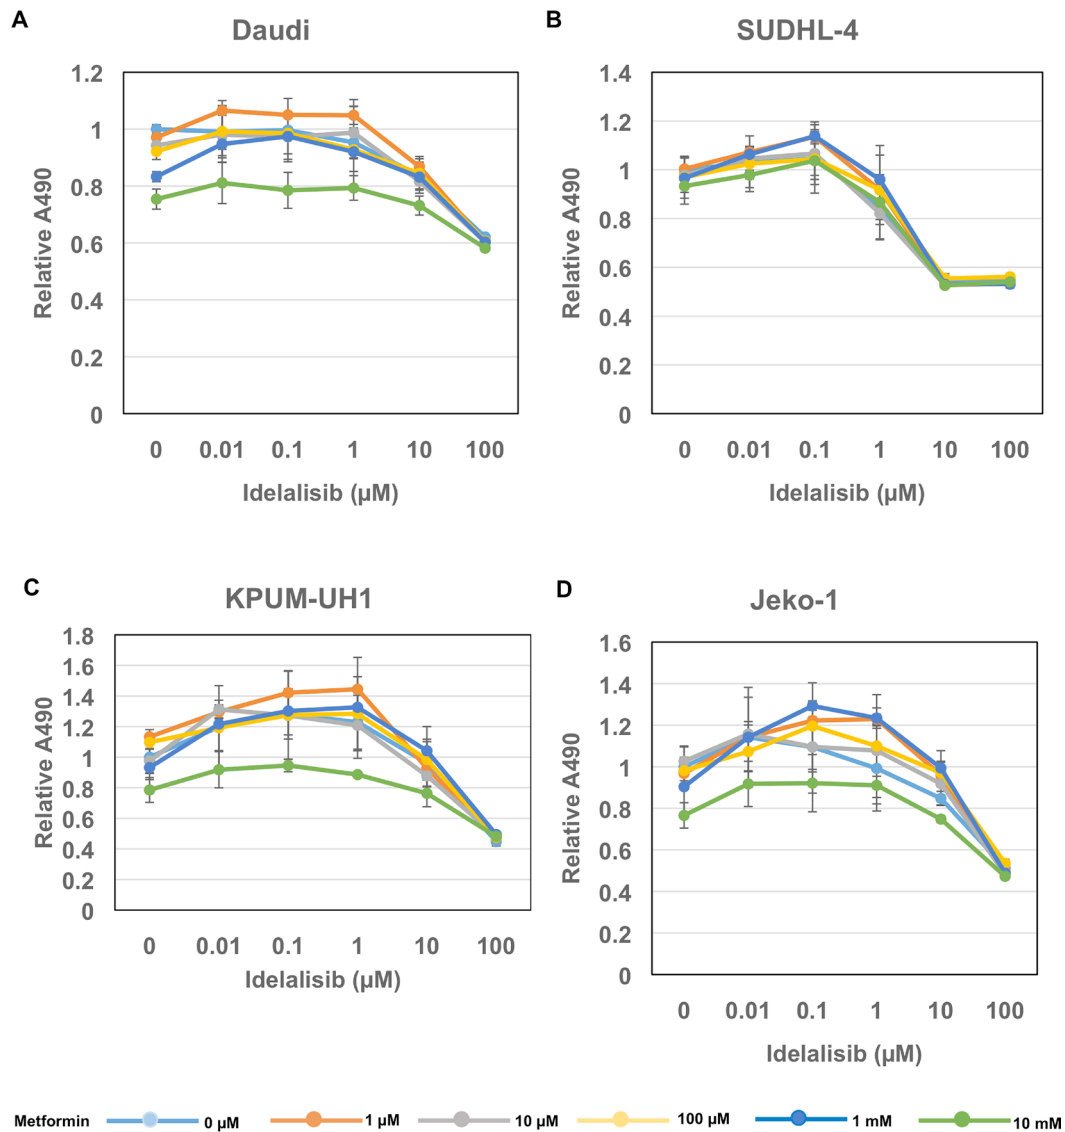

**Supplementary Figure 4: Metformin does not potentiate Idelalisib.** 10,000 cells (A Daudi, B SUDHL-4, C KPUM-UH1, D Jeko-1) were plated per well of a 96-well plate and treated with dose response series of both metformin (0–10 mM) and Idelalisib (0–100 μM). Viability after 3 days was analyzed using MTS assay. Briefly 20 μL of MTS reagent was added to cells and incubated for 2 hours and absorbance at 490nm was read using biotek plate reader. Relative absorbance is calculated after setting the average absorbance of No tx ctrl as 1.

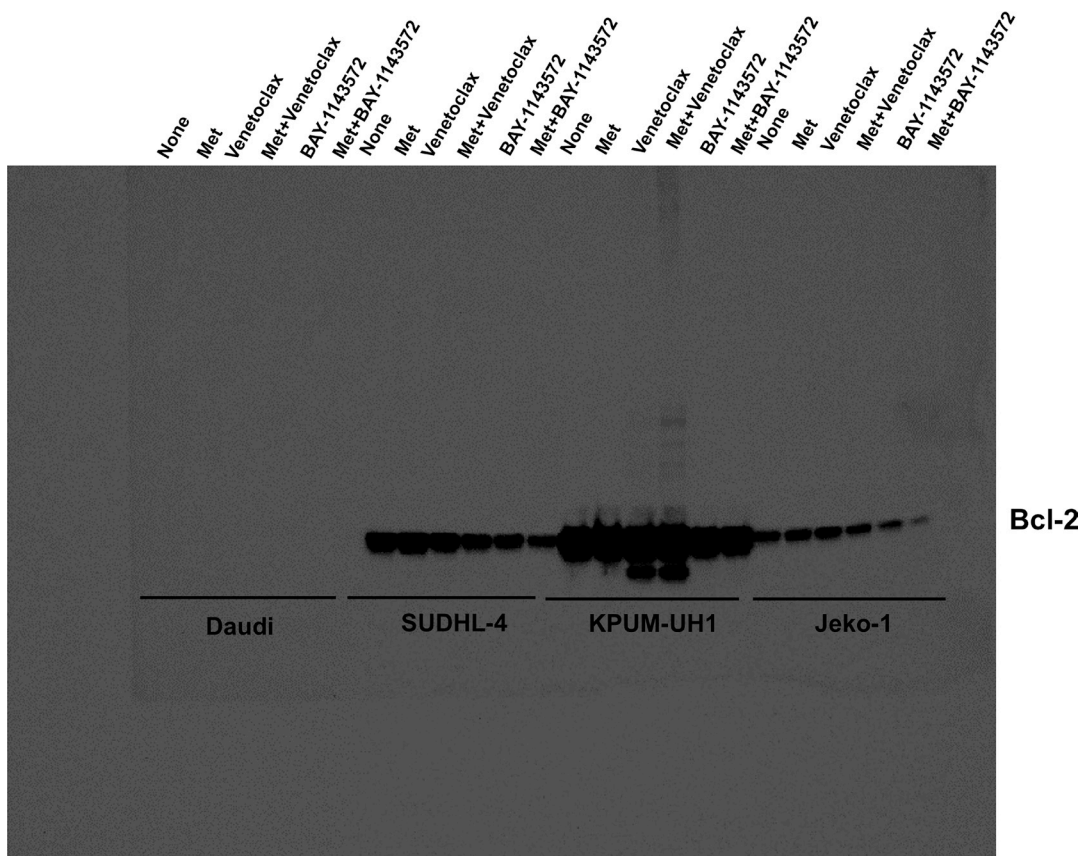

Supplementary Figure 5: Contrasted whole gel image of bcl-2 image shown in Figure 6.
